# Supplementary material for: Identification and Evaluation of Traditional Chinese Medicine Natural Compounds as Potential Myostatin Inhibitors: An In Silico Approach
Source: MDPI journal article supplement (doi:10.3390/molecules27134303), 2022-07-04
Supplement: s1 [file s1]

(Supplementary data)

***Identification and evaluation of traditional Chinese medicine natural compounds as potential myostatin inhibitors: An Insilico approach***

Shahid Ali<sup>1,2</sup>, Khurshid Ahmad<sup>1,2</sup>, Sibghatulla Shaikh<sup>1,2</sup>, Jeong Ho Lim<sup>1,2</sup>, Hee Jin Chun<sup>1,2</sup>, Syed Sayeed Ahmad<sup>1,2</sup>, Eun Ju Lee<sup>1,2</sup>, Inho Choi<sup>1,2\*</sup>

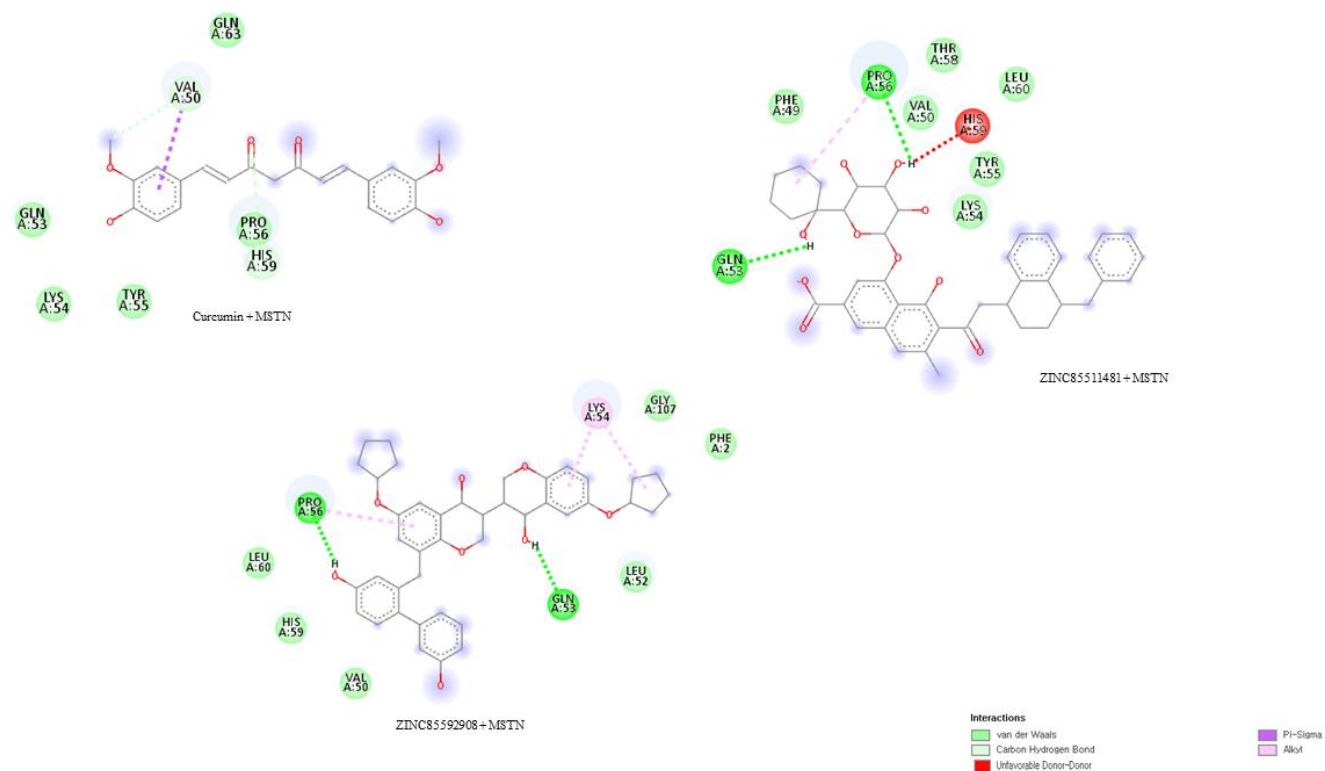

**Figure S1.** Leads interaction with MSTN protein.

**Table S1.** List of top 150 compounds showing apparent binding affinity.

| S. No. | Compound ID  | Affinity (kcal/mol) | S. No. | Compound ID  | Affinity (kcal/mol) | S. No. | Compound ID  | Affinity (kcal/mol) | S. No. | Compound ID  | Affinity (kcal/mol) |
|--------|--------------|---------------------|--------|--------------|---------------------|--------|--------------|---------------------|--------|--------------|---------------------|
| 1.     | ZINC85531198 | -13                 | 33.    | ZINC85628637 | -11.6               | 65.    | ZINC85593929 | -11.2               | 97.    | ZINC85596478 | -10.9               |
| 2.     | ZINC85531199 | -13                 | 34.    | ZINC85531248 | -11.5               | 66.    | ZINC70454202 | -11.2               | 98.    | ZINC85569094 | -10.9               |
| 3.     | ZINC85531200 | -12.9               | 35.    | ZINC85531161 | -11.5               | 67.    | ZINC85530919 | -11.2               | 99.    | ZINC95913306 | -10.9               |
| 4.     | ZINC85531201 | -12.8               | 36.    | ZINC85531399 | -11.5               | 68.    | ZINC85592456 | -11.1               | 100.   | ZINC85625736 | -10.9               |
| 5.     | ZINC85531202 | -12.8               | 37.    | ZINC85949541 | -11.5               | 69.    | ZINC85542935 | -11.1               | 101.   | ZINC85593863 | -10.9               |
| 6.     | ZINC85531203 | -12.6               | 38.    | ZINC85542603 | -11.5               | 70.    | ZINC95911591 | -11.1               | 102.   | ZINC95910145 | -10.9               |
| 7.     | ZINC85531204 | -12.5               | 39.    | ZINC42802834 | -11.5               | 71.    | ZINC85844973 | -11.1               | 103.   | ZINC85593341 | -10.9               |
| 8.     | ZINC85531205 | -12.5               | 40.    | ZINC85595996 | -11.5               | 72.    | ZINC85543478 | -11.1               | 104.   | ZINC85568324 | -10.9               |

|        |                 |                     |     |                 |       |     |                 |       |      |                 |       |
|--------|-----------------|---------------------|-----|-----------------|-------|-----|-----------------|-------|------|-----------------|-------|
| 9.     | ZINC85531206    | -12.4               | 41. | ZINC85531203    | -11.5 | 73. | ZINC85531095    | -11.1 | 105. | ZINC85593925    | -10.9 |
| 10.    | ZINC85531207    | -12.4               | 42. | ZINC85542646    | -11.5 | 74. | ZINC85542926    | -11.1 | 106. | ZINC85531068    | -10.9 |
| 11.    | ZINC85531208    | -12                 | 43. | ZINC85531409    | -11.4 | 75. | ZINC85541288    | -11.1 | 107. | ZINC95909694    | -10.9 |
| 12.    | ZINC85531209    | -12.4               | 44. | ZINC85542795    | -11.4 | 76. | ZINC85531118    | -11.1 | 108. | ZINC85811300    | -10.9 |
| 13.    | ZINC85531210    | -12.2               | 45. | ZINC85531224    | -11.4 | 77. | ZINC85543487    | -11.1 | 109. | ZINC85571143_01 | -10.9 |
| 14.    | ZINC85531211    | -12.2               | 46. | ZINC85542877    | -11.4 | 78. | ZINC85569037    | -11.1 | 110. | ZINC85811300_04 | -10.9 |
| 15.    | ZINC85531212    | -12.2               | 47. | ZINC70454202_01 | -11.4 | 79. | ZINC85592446_01 | -11.1 | 111. | ZINC85569041_01 | -10.9 |
| 16.    | ZINC85531213    | -12.1               | 48. | ZINC85531169    | -11.4 | 80. | ZINC85531062    | -11.1 | 112. | ZINC85531053    | -10.9 |
| 17.    | ZINC85531214    | -12                 | 49. | ZINC85531122    | -11.4 | 81. | ZINC85542917    | -11.1 | 113. | ZINC85569060    | -10.9 |
| 18.    | ZINC85531215    | -11.9               | 50. | ZINC85593856    | -11.4 | 82. | ZINC85568704    | -11   | 114. | ZINC85569082    | -10.8 |
| 19.    | ZINC85531216    | -11.9               | 51. | ZINC85542793    | -11.4 | 83. | ZINC85531185    | -11   | 115. | ZINC85627902_01 | -10.8 |
| 20.    | ZINC85531217    | -11.8               | 52. | ZINC85592445    | -11.3 | 84. | ZINC14680812    | -11   | 116. | ZINC85628579_01 | -10.8 |
| 21.    | ZINC85991498_01 | -11.8               | 53. | ZINC85569026_01 | -11.3 | 85. | ZINC85628579    | -11   | 117. | ZINC85511481    | -10.8 |
| 22.    | ZINC85542627    | -11.8               | 54. | ZINC85593929_01 | -11.3 | 86. | ZINC03780340    | -11   | 118. | ZINC85593878_01 | -10.8 |
| 23.    | ZINC85592441_01 | -11.7               | 55. | ZINC85531271    | -11.3 | 87. | ZINC85592903    | -11   | 119. | ZINC85542671    | -10.8 |
| 24.    | ZINC85531192    | -11.7               | 56. | ZINC85531302    | -11.3 | 88. | ZINC85593850_01 | -11   | 120. | ZINC85542639    | -10.8 |
| 25.    | ZINC85531087    | -11.7               | 57. | ZINC85531172    | -11.3 | 89. | ZINC85542801    | -11   | 121. | ZINC85593889_01 | -10.8 |
| 26.    | ZINC44086846    | -11.7               | 58. | ZINC85568681    | -11.2 | 90. | ZINC85593980_01 | -11   | 122. | ZINC85593910_01 | -10.8 |
| 27.    | ZINC85991498    | -11.7               | 59. | ZINC85568691    | -11.2 | 91. | ZINC85568324_01 | -11   | 123. | ZINC85593980    | -10.8 |
| 28.    | ZINC85541065    | -11.7               | 60. | ZINC85592448    | -11.2 | 92. | ZINC85568684    | -11   | 124. | ZINC85531359    | -10.8 |
| 29.    | ZINC85596043    | -11.7               | 61. | ZINC85542590    | -11.2 | 93. | ZINC85531180    | -11   | 125. | ZINC95910594    | -10.8 |
| 30.    | ZINC85531099    | -11.6               | 62. | ZINC85593886    | -11.2 | 94. | ZINC85542876    | -11   | 126. | ZINC85593293    | -10.8 |
| 31.    | ZINC85542810    | -11.6               | 63. | ZINC85628652_01 | -11.2 | 95. | ZINC85546719    | -10.9 | 127. | ZINC85593334    | -10.8 |
| 32.    | ZINC85592442_01 | -11.6               | 64. | ZINC85531136    | -11.2 | 96. | ZINC85628604    | -10.9 | 128. | ZINC85532197    | -10.7 |
| S. No. | Compound ID     | Affinity (kcal/mol) |     |                 |       |     |                 |       |      |                 |       |
| 129.   | ZINC85531344    | -10.8               |     |                 |       |     |                 |       |      |                 |       |
| 130.   | ZINC04098621    | -10.8               |     |                 |       |     |                 |       |      |                 |       |
| 131.   | ZINC85569039_01 | -10.8               |     |                 |       |     |                 |       |      |                 |       |
| 132.   | ZINC85592908    | -10.8               |     |                 |       |     |                 |       |      |                 |       |
| 133.   | ZINC85543486    | -10.8               |     |                 |       |     |                 |       |      |                 |       |
| 134.   | ZINC04098631    | -10.8               |     |                 |       |     |                 |       |      |                 |       |
| 135.   | ZINC85542734    | -10.8               |     |                 |       |     |                 |       |      |                 |       |
| 136.   | ZINC85592913    | -10.8               |     |                 |       |     |                 |       |      |                 |       |
| 137.   | ZINC85542803    | -10.8               |     |                 |       |     |                 |       |      |                 |       |
| 138.   | ZINC85593896    | -10.8               |     |                 |       |     |                 |       |      |                 |       |
| 139.   | ZINC85627948_01 | -10.8               |     |                 |       |     |                 |       |      |                 |       |
| 140.   | ZINC85592445_01 | -10.8               |     |                 |       |     |                 |       |      |                 |       |
| 141.   | ZINC85569299    | -10.7               |     |                 |       |     |                 |       |      |                 |       |

|      |                 |       |
|------|-----------------|-------|
| 142. | ZINC85592443_01 | -10.7 |
| 143. | ZINC85947357_01 | -10.7 |
| 144. | ZINC85593826    | -10.7 |
| 145. | ZINC85596012    | -10.7 |
| 146. | ZINC85532197_01 | -10.7 |
| 147. | ZINC85568577    | -10.7 |
| 148. | ZINC85593975_02 | -10.7 |
| 149. | ZINC85593856_01 | -10.7 |
| 150. | ZINC85542903    | -10.7 |

**Table S2. Percentage of secondary structure element in MSTN protein.**

| S. No | Compound IDs | Strand | Alpha helix | 3-10 helix | Other |
|-------|--------------|--------|-------------|------------|-------|
| 1.    | ZINC85511481 | 27.5   | 5.5         | 1.8        | 65.1  |
| 2.    | ZINC85592908 | 38.5   | 8.3         | 0          | 53.2  |
| 3.    | Curcumin     | 39.4   | 5.5         | 0          | 55    |
